# Supplementary material for: Regenerative Adaptation to Electrochemical Perturbation in Planaria: A Molecular Analysis of Physiological Plasticity
Source: PubMed Central journal article supplement — iScience. 2019 Nov 9;22:147–65. doi: 10.1016/j.isci.2019.11.014 (PMC6881696; doi:10.1016/j.isci.2019.11.014), 2019-11-09
Supplement: mmc1.pdf [file mmc1.pdf]

**ISCI, Volume 22**

**Supplemental Information**

**Regenerative Adaptation to Electrochemical**

**Perturbation in Planaria: A Molecular**

**Analysis of Physiological Plasticity**

**Maya Emmons-Bell, Fallon Durant, Angela Tung, Alexis Pietak, Kelsie Miller, Anna Kane, Christopher J. Martyniuk, Devon Davidian, Junji Morokuma, and Michael Levin**

## Supplemental Information

### Supplemental Figures

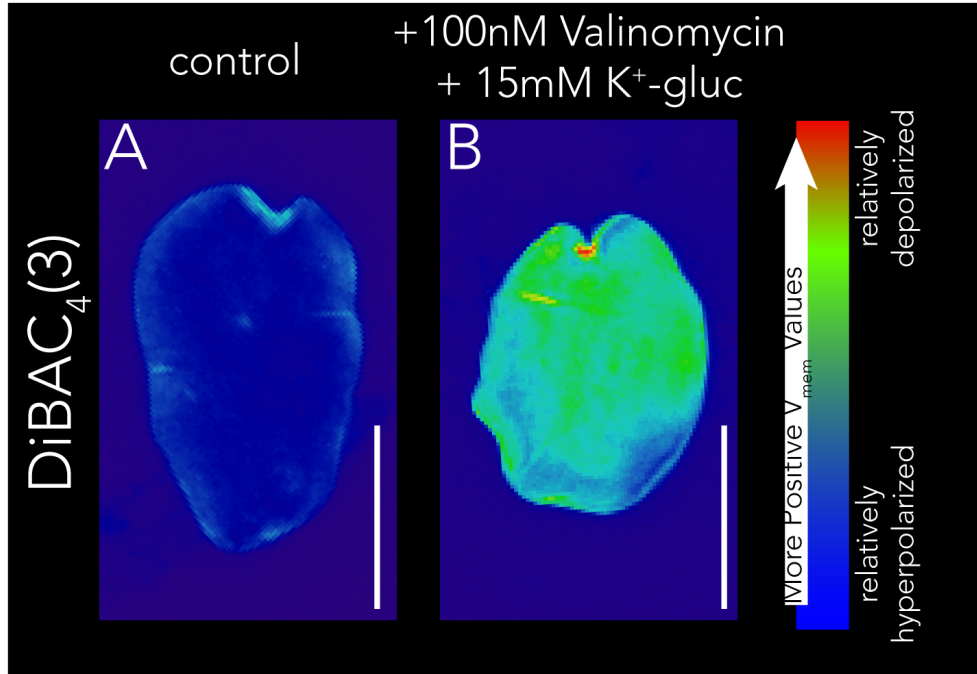

**Figure S1.** Valinomycin and potassium gluconate-induced depolarization can be visualized with DiBAC<sub>4</sub>(3), Related to Figure 3. Pretail fragments (fragments that contain the trunk region of the worm posterior to the pharynx and anterior to the tail) of *Dugesia japonica* were cut and placed into vehicle (A) or 100nM Valinomycin + 15mM potassium gluconate (K<sup>+</sup>-gluc) (B) for 1 hour, then mounted and imaged. Both Valinomycin and K<sup>+</sup>-gluc were used to optimize depolarization. Images were taken of ventral surface of fragment and were far-field and dark-field corrected. Images are pseudocolored to allow for ease of visualization of depolarization patterns, but worms were imaged in the same frame so as not to confound data after pseudocoloring, and all image analysis was done using raw images. Scale bars 0.5mm.

A

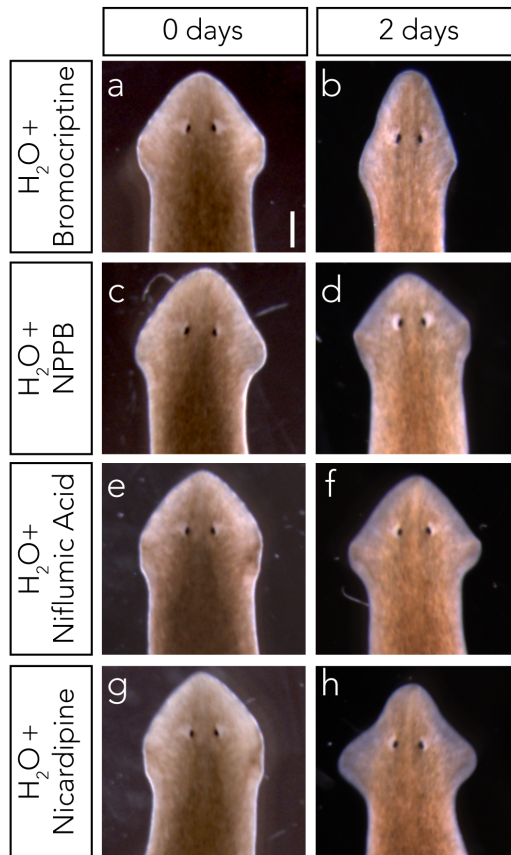

**Figure S2.** Drug treatment alone does not affect planaria, Related to Figure 4. **(A)** Exposure to Bromocriptine **(a,b)**, NPPB **(c,d)**, Niflumic acid **(e,f)**, or Nicardipine **(g,h)** for 2 days had no observable effect on *D. japonica* morphology.

## Supplemental Tables

**Table S2.** Data statistics for RNA-seq, Related to Figure 2 and Tables 1 and 3. The 40 bp single end reads generated by Illumina HiSeq 2500 were quality checked and processed to remove the low quality bases and the adapter contamination. The table below lists the data generated for the individual samples.

| Sample name     | Chemistry | Barcode sequences | Total number of reads generated Post-processing (in millions ) |
|-----------------|-----------|-------------------|----------------------------------------------------------------|
| WildType Head 2 | 40*1      | TS13-AGTCAA       | 33.67                                                          |
| WildType Head 1 | 40*1      | TS12-CTTGTA       | 39.18                                                          |
| BaCl2 Head 2    | 40*1      | TS11-GGCTAC       | 36.72                                                          |
| BaCl2 Head 1    | 40*1      | TS10-TAGCTT       | 34.64                                                          |

**Table S3.** Alignment statistics for RNA-seq experiments, Related to Figure 2 and Tables 1 and 3. As the gene feature file for *Dugesia japonica* is not available, the reads were aligned to the *Dugesia japonica* (complete CDS regions) taken from NCBI (<https://www.ncbi.nlm.nih.gov/nucore/?term=Dugesia%20japonica>) which consists of 138,026 nucleotide sequences, downloaded from the NCBI database using Tophat. The table below shows the alignment percentage of the reads mapped to the reference.

| Sample name     | No of reads (in millions) | Alignment percentage |
|-----------------|---------------------------|----------------------|
| WildType Head 2 | 33.67                     | 92.60%               |
| WildType Head 1 | 39.18                     | 94.30%               |
| BaCl2 Head 2    | 36.72                     | 93.90%               |
| BaCl2 Head 1    | 34.64                     | 96.20%               |

**Table S4.** Gene Ontology Analysis, Related to Figure 2 and Tables 1 and 3. Most significant gene ontology categories affected at the transcript level with BaCl<sub>2</sub>. All data for gene ontology can be found in Table S5.

| <b>Go Term Theme</b> | <b>Category</b>                                                  | <b>Frequency</b> | <b>PAGE Z-Score</b> | <b>PAGE Raw p-value</b> | <b>FDR</b> |
|----------------------|------------------------------------------------------------------|------------------|---------------------|-------------------------|------------|
| Biological Process   | translation [go:0006412]                                         | 96               | 6.602042            | 4.06E-11                | 5.72E-09   |
|                      | intracellular protein transport [go:0006886]                     | 53               | 2.867622            | 0.004136                | 0.291566   |
|                      | cell cycle [go:0007049]                                          | 17               | -2.63838            | 0.00833                 | 0.391526   |
|                      | tricarboxylic acid cycle [go:0006099]                            | 21               | 2.35727             | 0.01841                 | 0.439486   |
|                      | transmembrane receptor protein tyrosine kinase signaling pathway | 5                | 2.270731            | 0.023163                | 0.439486   |
|                      | pyrimidine nucleotide biosynthetic process [go:0006221]          | 5                | 2.248818            | 0.024524                | 0.439486   |
|                      | protein glycosylation [go:0006486]                               | 29               | 2.239905            | 0.025097                | 0.439486   |
|                      | dna recombination [go:0006310]                                   | 8                | -2.21806            | 0.026551                | 0.439486   |
|                      | de novo' pyrimidine nucleobase biosynthetic process [go:0006207] | 6                | 2.196554            | 0.028052                | 0.439486   |
|                      | dna integration [go:0015074]                                     | 20               | -2.14806            | 0.031709                | 0.447092   |
|                      | malate metabolic process [go:0006108]                            | 6                | -2.03848            | 0.041502                | 0.492306   |
|                      | vesicle-mediated transport [go:0016192]                          | 35               | 1.986827            | 0.046942                | 0.492306   |
| Molecular Function   | structural constituent of cytoskeleton [go:0005200]              | 89               | -7.40681            | 1.29E-13                | 2.69E-11   |
|                      | structural constituent of ribosome [go:0003735]                  | 100              | 6.812948            | 9.56E-12                | 9.94E-10   |
|                      | acyl-coa dehydrogenase activity [go:0003995]                     | 9                | 3.133764            | 0.001726                | 0.119655   |
|                      | nad-dependent histone deacetylase activity (h3-k14 specific)     | 7                | 3.026156            | 0.002477                | 0.128796   |
|                      | nad+ kinase activity [go:0003951]                                | 7                | 2.825761            | 0.004717                | 0.196221   |

|                    |                                                                 |    |          |          |          |
|--------------------|-----------------------------------------------------------------|----|----------|----------|----------|
|                    | proton-transporting atp synthase activity, rotational mechanism | 7  | 2.604398 | 0.009204 | 0.275972 |
|                    | protein tyrosine phosphatase activity [go:0004725]              | 38 | -2.54166 | 0.011033 | 0.275972 |
|                    | nucleotidyltransferase activity [go:0016779]                    | 12 | 2.513792 | 0.011944 | 0.275972 |
|                    | microtubule binding [go:0008017]                                | 39 | -2.45754 | 0.013989 | 0.275972 |
|                    | mannosyl-oligosaccharide 1,2-alpha-mannosidase activity         | 8  | 2.449566 | 0.014303 | 0.275972 |
|                    | extracellular matrix structural constituent [go:0005201]        | 16 | -2.43919 | 0.01472  | 0.275972 |
|                    | flavin adenine dinucleotide binding [go:0050660]                | 27 | 2.410711 | 0.015921 | 0.275972 |
|                    | histone-lysine n-methyltransferase activity [go:0018024]        | 14 | 2.330139 | 0.019799 | 0.297096 |
|                    | inorganic anion exchanger activity [go:0005452]                 | 7  | 2.326406 | 0.019997 | 0.297096 |
|                    | carboxypeptidase activity [go:0004180]                          | 7  | 2.091671 | 0.036468 | 0.425427 |
|                    | peptidyl-dipeptidase activity [go:0008241]                      | 7  | 2.091671 | 0.036468 | 0.425427 |
|                    | chromatin binding [go:0003682]                                  | 9  | 2.068059 | 0.038634 | 0.425427 |
|                    | ubiquitin-protein transferase activity [go:0004842]             | 48 | 2.020134 | 0.043369 | 0.425427 |
|                    | phospholipid binding [go:0005543]                               | 6  | 1.997395 | 0.045782 | 0.425427 |
|                    | carbohydrate binding [go:0030246]                               | 16 | 1.970462 | 0.048785 | 0.425427 |
| Cellular Component | ribosome [go:0005840]                                           | 83 | 5.158659 | 2.49E-07 | 1.77E-05 |
|                    | small ribosomal subunit [go:0015935]                            | 9  | 3.061898 | 0.002199 | 0.078078 |
|                    | cytosol [go:0005829]                                            | 11 | 2.920361 | 0.003496 | 0.082745 |
|                    | nucleolus [go:0005730]                                          | 21 | -2.30831 | 0.020982 | 0.346204 |
|                    | large ribosomal subunit [go:0015934]                            | 10 | 2.206271 | 0.027365 | 0.346204 |

|  |                                     |    |          |          |          |
|--|-------------------------------------|----|----------|----------|----------|
|  | extracellular space<br>[go:0005615] | 15 | 2.180011 | 0.029257 | 0.346204 |
|  | motile cilium<br>[go:0031514]       | 7  | -2.04248 | 0.041104 | 0.416915 |

**Table S6.** Lists of genes depicted in Figure 2A and B, Related to Figure 2. **(A)** Full list of altered anion transport-related genes shown in Figure 2A. **(B)** Full list of altered transmission of nerve impulse-related genes shown in Figure 2C.

**Table 6A**

| <b>Name</b> | <b>Probe Value</b> | <b>Description</b>                                                          |
|-------------|--------------------|-----------------------------------------------------------------------------|
| ABCA1       | 1.0018             | ATP-binding cassette, sub-family A (ABC1), member 1                         |
| SLC12A2     | 0.3578             | solute carrier family 12 (sodium/potassium/chloride transporters), member 2 |
| SLC26A3     | -2.0998            | solute carrier family 26 (anion exchanger), member 3                        |
| SLC4A3      | 0.0388             | solute carrier family 4, anion exchanger, member 3                          |
| SLC26A4     | -1.201             | solute carrier family 26, member 4                                          |
| SLC17A1     | 10.9346            | solute carrier family 17 (organic anion transporter), member 1              |
| SLC22A11    | 3.5889             | solute carrier family 22 (organic anion/urate transporter), member 11       |
| ABCC3       | 1.3558             | ATP-binding cassette, sub-family C (CFTR/MRP), member 3                     |
| SLCO1A2     | -1.2222            | solute carrier organic anion transporter family, member 1A2                 |
| ABCC2       | -0.4388            | ATP-binding cassette, sub-family C (CFTR/MRP), member 2                     |
| ABCC1       | -0.896             | ATP-binding cassette, sub-family C (CFTR/MRP), member 1                     |
| SLC22A6     | -1.1533            | solute carrier family 22 (organic anion transporter), member 6              |
| ABCB1       | -0.896             | ATP-binding cassette, sub-family B (MDR/TAP), member 1                      |
| CAT         | 0.4148             | catalase                                                                    |
| UCP1        | -0.2243            | uncoupling protein 1 (mitochondrial, proton carrier)                        |
| TSPO        | 0.6788             | translocator protein (18kDa)                                                |
| m_Slco1a1   | -1.2222            | solute carrier organic anion transporter family, member 1a1                 |

**Table 6B**

| <b>Name</b> | <b>Probe Value</b> | <b>Description</b>                                           |
|-------------|--------------------|--------------------------------------------------------------|
| CTNNB1      | -3.0765            | catenin (cadherin-associated protein), beta 1, 88kDa         |
| SLC8A1      | 1.8271             | solute carrier family 8 (sodium/calcium exchanger), member 1 |

|          |         |                                                                                          |
|----------|---------|------------------------------------------------------------------------------------------|
| SLC12A2  | 0.3578  | solute carrier family 12 (sodium/potassium/chloride transporters), member 2              |
| SLC4A3   | 0.0388  | solute carrier family 4, anion exchanger, member 3                                       |
| GRIA2    | 0.3083  | glutamate receptor, ionotropic, AMPA 2                                                   |
| GRIK2    | 2.546   | glutamate receptor, ionotropic, kainate 2                                                |
| TRPC3    | 0.5344  | transient receptor potential cation channel, subfamily C, member 3                       |
| ASIC5    | 2.4432  | acid-sensing (proton-gated) ion channel family member 5                                  |
| P2RX4    | 0.8279  | purinergic receptor P2X, ligand-gated ion channel, 4                                     |
| CACNA2D1 | 1.3416  | calcium channel, voltage-dependent, alpha 2/delta subunit 1                              |
| KCNA3    | 0.8759  | potassium voltage-gated channel, shaker-related subfamily, member 3                      |
| KCNC2    | -1.0571 | potassium voltage-gated channel, Shaw-related subfamily, member 2                        |
| KCNH2    | 0.7843  | potassium voltage-gated channel, subfamily H (eag-related), member 2                     |
| CAT      | 0.4148  | catalase                                                                                 |
| FAAH     | -0.8367 | fatty acid amide hydrolase                                                               |
| GLUL     | -1.415  | glutamate-ammonia ligase                                                                 |
| NPR1     | 0.6392  | natriuretic peptide receptor A/guanylate cyclase A (atrionatriuretic peptide receptor A) |
| DAO      | 1.1035  | D-amino-acid oxidase                                                                     |
| ERG      | 1.5128  | v-ets erythroblastosis virus E26 oncogene homolog (avian)                                |
| FOS      | -0.2607 | FBJ murine osteosarcoma viral oncogene homolog                                           |
| JUN      | 0.3939  | jun proto-oncogene                                                                       |
| REST     | -0.1284 | RE1-silencing transcription factor                                                       |
| EGFR     | 1.2985  | epidermal growth factor receptor                                                         |
| MEN1     | -1.3847 | multiple endocrine neoplasia I                                                           |
| MARK2    | -1.9312 | MAP/microtubule affinity-regulating kinase 2                                             |
| UBC      | 0.2766  | ubiquitin C                                                                              |
| RANBP2   | -0.375  | RAN binding protein 2                                                                    |
| CAV1     | -1.0436 | caveolin 1, caveolae protein, 22kDa                                                      |
| SNAP25   | -0.228  | synaptosomal-associated protein, 25kDa                                                   |
| ANK2     | 1.1996  | ankyrin 2, neuronal                                                                      |
| KIF5B    | -0.1274 | kinesin family member 5B                                                                 |
| PANX1    | -3.5446 | pannexin 1                                                                               |
| AGRN     | -1.2874 | agrin                                                                                    |
| GFAP     | 1.8981  | glial fibrillary acidic protein                                                          |
| NALCN    | 0.8476  | sodium leak channel, non-selective                                                       |
| INS      | 1.5798  | insulin                                                                                  |
| NTN1     | 1.616   | netrin 1                                                                                 |
| TNF      | -0.25   | tumor necrosis factor                                                                    |
| CDC42    | -0.2927 | cell division cycle 42 (GTP binding protein)                                             |
| RAC1     | 0.0752  | ras-related C3 botulinum toxin substrate 1 (rho family, small GTP binding protein Rac1)  |



|         |         |                                                                                        |
|---------|---------|----------------------------------------------------------------------------------------|
| RAP1B   | 0.6267  | RAP1B, member of RAS oncogene family                                                   |
| RASGRF1 | -0.9149 | Ras protein-specific guanine nucleotide-releasing factor 1                             |
| MYLK    | 1.7125  | myosin light chain kinase                                                              |
| CASP3   | -0.7907 | caspase 3, apoptosis-related cysteine peptidase                                        |
| GP1R    | 0.3777  | G protein-coupled estrogen receptor 1                                                  |
| NPY1R   | 85.4924 | neuropeptide Y receptor Y1                                                             |
| CXCR4   | 85.4924 | chemokine (C-X-C motif) receptor 4                                                     |
| MMP9    | 3.4586  | matrix metalloproteinase 9 (gelatinase B, 92kDa gelatinase, 92kDa type IV collagenase) |
| CDK5    | -0.2833 | cyclin-dependent kinase 5                                                              |
| BRSK2   | -0.8513 | BR serine/threonine kinase 2                                                           |
| RAB8A   | 2.13    | RAB8A, member RAS oncogene family                                                      |
| RAB10   | 0.0681  | RAB10, member RAS oncogene family                                                      |
| APC     | 1.0329  | adenomatous polyposis coli                                                             |
| PICK1   | 1.3926  | protein interacting with PRKCA 1                                                       |
| ACE     | 0.9108  | angiotensin I converting enzyme (peptidyl-dipeptidase A) 1                             |
| PRMT1   | -0.1001 | protein arginine methyltransferase 1                                                   |
| DBI     | -0.085  | diazepam binding inhibitor (GABA receptor modulator, acyl-Coenzyme A binding protein)  |
| TSPO    | 0.6788  | translocator protein (18kDa)                                                           |
| MSRA    | -1.1203 | methionine sulfoxide reductase A                                                       |
| PITPNA  | -0.3698 | phosphatidylinositol transfer protein, alpha                                           |
| GRIK1   | -3.1039 | glutamate receptor, ionotropic, kainate 1                                              |

## Transparent Methods

### *Planarian care*

A clonal strain of *Dugesia japonica* was maintained at 13 °C in Poland Spring water with weekly feedings of liver paste and twice-weekly water changes, as in (Oviedo et al., 2008a). Worms were maintained at 13°C for the duration of the experiment in order to prevent spontaneous fissioning, which occurs at a greater rate at higher temperatures and which would interfere with interpretation of results regarding timing of regeneration (Oviedo et al., 2008a). Due to experimental temperature being 13°C, worms were taken from a cold-adapted 13 °C colony which is continuously maintained at that temperature. Worms were starved for at least one week prior to the beginning of each experiment.

### *BaCl<sub>2</sub> Adaptation and Loss of Adaptation*

Whole worms were maintained at 13 °C in untreated tissue culture plates containing either Poland Spring water or 1 mM BaCl<sub>2</sub> (MP Biomedicals Inc) in Poland Spring water (BaCl<sub>2</sub> solution). Both water and BaCl<sub>2</sub> solutions were replaced once a week. A maximum of 30 worms were kept in each plate (diameter 100 mm), which contained approximately 50 mL of solution. Progression of response to BaCl<sub>2</sub> was assessed by regular examination of animals using a stereoscope. Worms that had fully regenerated in refreshed BaCl<sub>2</sub> for at least three weeks and were indistinguishable in appearance from untreated worms were designated “BaCl<sub>2</sub>-adapted worms.”

To assess the persistence of the BaCl<sub>2</sub> adaptation, BaCl<sub>2</sub>-adapted worms were removed from the 1mM BaCl<sub>2</sub> solution and maintained in untreated tissue culture plates at 13 °C in Poland Spring water for 30 days before being placed again in 1mM BaCl<sub>2</sub> solution.

### *Drug treatments: BaCl<sub>2</sub> and ion channel blockers*

In order to test the effects of particular channels on BaCl<sub>2</sub> adaptation, planaria were exposed to 1mM BaCl<sub>2</sub> in the presence of drugs that modify channels. In each case, planaria were exposed to either BaCl<sub>2</sub>+treatment solution (Poland Spring water with 1 mM BaCl<sub>2</sub> and the respective drug) as well as 3 control solutions. Control solutions were Poland Spring water plus matching concentration of DMSO, drug control solution (Poland Spring water plus the drug (dissolved in DMSO)), or BaCl<sub>2</sub>-control solution (Poland Spring water, 1mM BaCl, and matching DMSO concentration). DMSO concentration never exceeded .1% as higher concentrations have been shown to interfere with normal planarian function (Pagan et al., 2006, Stevens et al., 2015, Yuan et al., 2012). Worms were maintained in tissue culture treated dishes at 13 °C. Multiple concentrations were tested for each drug, and the lowest effective concentration was used for each.

Bromocriptine mesylate at a final concentration of 0.5 μM (Tocris #0427), dissolved in Poland Spring from a stock dissolved in DMSO (final DMSO concentration: 0.0075%) was used to block monoamines. Inhibition of calcium activated chloride channels was performed using 5.0 μM 5-Nitro-2-(3-phenylpropylamino)benzoic acid (NPPB, Cayman Chemical #17292) or 1.25 μM niflumic acid (Tocris #4112) in Poland Spring from a stock dissolved in DMSO (final DMSO concentration 0.006% or 0.000726%, respectively). Inhibition of calcium channels was performed using 2.5 μM nifedipine hydrochloride (Sigma-Aldrich #N7510) in Poland Spring from a stock dissolved in DMSO (final concentration of DMSO 0.0025%). Inhibition of TRPM was achieved using 100 μM AMTB hydrochloride (Tocris #3989) in Poland Spring from a stock dissolved in DMSO (final concentration of DMSO 0.1%). For AMTB treatments, media was refreshed once a week, all other solutions were refreshed every two days.

### *Visualization of relative membrane potentials with DiBAC<sub>4</sub>(3) dye imaging*

DiBAC<sub>4</sub>(3) (bis-(1,3-dibutylbarbituric acid)-trimethine oxanol) (Invitrogen) was used as previously described (Oviedo et al., 2008b). Briefly, a stock solution (1.9 mM) was diluted 1:1000 (1.9  $\mu$ M) in Poland Spring water or 1 mM BaCl<sub>2</sub> solution, and worms were soaked in the DiBAC<sub>4</sub>(3) solution for >30 minutes before imaging. Worms were then immobilized in 2% low-melting point agarose, using custom-fabricated Planarian Immobilization Chips as per Dexter and colleagues (Dexter et al., 2014). Images of the ventral side of immobilized planaria were captured with the Nikon AZ100 Stereomicroscope using epifluorescence optics and NIS-Elements imaging software. Treatment and control animals were captured within the same frame and care was taken to ensure that planaria did not move during image acquisition. No data points or image features were removed from our analysis. To quantify differences in relative depolarization, average pixel intensity of the head region, defined as the anterior 1/6<sup>th</sup> of the worm, was quantified with ImageJ, after flat-field correction. This treatment avoided confounding the analysis by including fluorescence due to background and slime.

### *RNA extraction and RNA-seq*

Total RNA was extracted from wild type and BaCl<sub>2</sub>-adapted *D. japonica* heads. Two biological replicates were collected for each treatment, with 25 worms pooled per replicate. Worms were kept in 1 mM BaCl<sub>2</sub> for 35 days, when BaCl<sub>2</sub>-insensitive heads had fully regenerated. Heads (as defined by the anterior 1/6<sup>th</sup> of the worm) were then amputated and RNA was extracted using Trizol (Ambion/ThermoFisher) as per the manufacturer's instructions. RNA was pelleted via isopropanol extraction and then suspended in 80% ethanol. Following DNase-treatment, the concentration of RNA was crudely quantified via NanoDrop™, and samples were stored at -80°C. Samples were sent to the Whitehead Institute Genome Technology Core for sequencing. Quality control for RNA was conducted using an Agilent 2100 Bioanalyzer. While RIN scores cannot be used with planarian species due to an absence of 28s rRNA peaks (Kim, 2019, Liu and Rink, 2018), we confirmed quality of RNA prior to library prep with the sequencing core. Library prep was performed on high quality RNA using the TruSeq PolyA kit (Illumina) as per manufacturer's protocol. All sequencing libraries were then quantified, pooled and sequenced at single-end 40 base-pair using the Illumina HiSeq 2500. Following sequencing, data processing was done using the standard Illumina pipeline and Fastq files were generated for data processing and assembly.

### *Data Processing and Assembly*

Raw Illumina files were processed by Genotypic Technology Ltd. (Bangalore, India) for read mapping and the identification of differentially expressed transcripts. Raw data were downloaded and processed (Adapter, B-block and low-quality base filtering) using Genotypic's proprietary Perl script for removing adapter and low-quality base trimming. RNA-Seq reads were then mapped using the ultra-high-throughput short read aligner Bowtie (Langmead, 2010) and reference alignment was conducted with TopHat-2.0.13 (Trapnell et al., 2009), a fast splice junction mapper for RNA-Seq reads. Processed data were inputted into TopHat and default parameters for directional libraries were used. Cufflinks-2.2.1 was used to assemble transcripts and to identify transcripts that were differentially expressed using default settings and -G option to facilitate read mapping. Biological replicates were combined using Cuffmerge and then analyzed using CuffDiff (2.2.1) for replicate samples by modeling the variance in fragment counts across replicates as a function of the mean fragment count. Each replicated condition was first used to build a model. Models were generated from each biological replicate and were averaged to provide a single global model for all conditions in the experiment. Cuffdiff was then used

to determine significant changes in transcript levels. Data and alignment statistics for the Illumina runs are presented in Tables S2 and S3.

Expression level estimation was reported as fragments per kilobase of transcript sequence per million mapped fragments (FPKM) value together with confidence intervals. The false discovery rate or FDR-adjusted p-value of the test statistic (q-value) was also generated. An in-house pipeline was developed to automate the abovementioned mapping and assembly process. All transcripts were annotated for Gene Ontology (GO) by performing a blast alignment. The 138,026 transcript sequences of *D. japonica* were subjected to blast against the 385,255 sequences of Platyhelminthes database extracted from Uniprot as a reference. Table S1 contains all processed transcript data, including fold change and p-value.

Pathway Studio 10.0 (Elsevier) and ResNet 11.0 were used for sub-network enrichment analysis (SNEA) of cell processes. The option of “best p value, highest magnitude fold change” in Pathway Studio was used for duplicated probes. Transcripts were successfully mapped using Name and Alias. SNEA was performed to identify gene networks that were significantly different in the treatment samples compared to control. A Kolmogorov–Smirnov test with 1000 permutations was conducted to determine whether specific networks were preferentially regulated compared to the background reference probability distribution. Networks were constructed based on common regulators of expression and regulators of specific cell processes. The enrichment p-value for a gene seed was set at  $p < 0.05$ . Additional details on the use of SNEA can be found in (Langlois and Martyniuk, 2013).

#### *qPCR*

1  $\mu\text{g}$  total RNA extracted from the anterior 1/6<sup>th</sup> of *Dugesia japonica* was DNase treated and used as a template to synthesize cDNA (iScript gDNA Clear cDNA Synthesis Kit, BioRad, USA). PCR primers for Dj-TRPMA were obtained from the Agata lab (Inoue et al., 2014). Slc2a1 primers (F: 5'-TTGAACGATTCCGACCGCA-3', R: 5'-GGGTTTGCTTTGGGACTAGGA-3') were designed based on the upregulated sequences identified in the RNAseq analysis and were validated using melt curve analysis. GAPDH (Takano et al., 2007) was used as the reference gene. For qPCR, each 10  $\mu\text{L}$  reaction was run in duplicate and contained: 5  $\mu\text{L}$  of 2x PowerUp SYBR Green Master Mix (Applied Biosystems, USA), 0.5  $\mu\text{L}$  of 10  $\mu\text{M}$  of forward and reverse gene-specific primers, and 1.33  $\mu\text{L}$  of diluted (1:20 for Slc2a1, 1:5 for Dj-TRPMA) cDNA template. qPCR was performed using the Step One Plus Real Time System (Applied Biosystems, USA) according to manufacturer's instructions. Relative expression was analyzed using the Pfaffl method (Pfaffl, 2001).

#### *Data and Software Availability*

RNA-Seq unprocessed data has been deposited in the National Center for Biotechnology Information (NCBI) Gene Expression Omnibus (GEO) and is accessible through GEO Series accession number (GSE98084).

## Supplemental References

- DEXTER, J. P., TAMME, M. B., LIND, C. H. & COLLINS, E. M. 2014. On-chip immobilization of planarians for in vivo imaging. *Scientific reports*, 4, 6388.
- INOUE, T., YAMASHITA, T. & AGATA, K. 2014. Thermosensory signaling by TRPM is processed by brain serotonergic neurons to produce planarian thermotaxis. *J Neurosci*, 34, 15701-14.
- KIM, I. V., ROSS, ERIC J., DIETRICH, SASCHA, DÖRING, KRISTINA, ALVARADO, ALEJANDRO SÁNCHEZ, KUHN, CLAUS-D. 2019. Efficient depletion of ribosomal RNA for RNA sequencing in planarians. *bioRxiv*, 670604.
- LANGLOIS, V. S. & MARTYNIUK, C. J. 2013. Genome wide analysis of *Silurana* (*Xenopus*) *tropicalis* development reveals dynamic expression using network enrichment analysis. *Mechanisms of development*, 130, 304-22.
- LANGMEAD, B. 2010. Aligning short sequencing reads with Bowtie. *Curr Protoc Bioinformatics*, Chapter 11, Unit 11 7.
- LIU, S.-Y. & RINK, J. C. 2018. Total RNA Isolation from Planarian Tissues. In: RINK, J. C. (ed.) *Planarian Regeneration: Methods and Protocols*. New York, NY: Springer New York.
- OVIEDO, N. J., NICOLAS, C. L., ADAMS, D. S. & LEVIN, M. 2008a. Establishing and maintaining a colony of planarians. *CSH Protoc.*, 2008, db.prot5053.
- OVIEDO, N. J., NICOLAS, C. L., ADAMS, D. S. & LEVIN, M. 2008b. Live Imaging of Planarian Membrane Potential Using DiBAC4(3). *Cold Spring Harb Protoc*, 2008, pdb.prot5055-.
- PAGAN, O. R., ROWLANDS, A. L. & URBAN, K. R. 2006. Toxicity and behavioral effects of dimethylsulfoxide in planaria. *Neurosci Lett*, 407, 274-8.
- PFAFFL, M. W. 2001. A new mathematical model for relative quantification in real-time RT-PCR. *Nucleic Acids Res*, 29, e45.
- STEVENS, A. S., PIROTTE, N., PLUSQUIN, M., WILLEMS, M., NEYENS, T., ARTOIS, T. & SMEETS, K. 2015. Toxicity profiles and solvent-toxicant interference in the planarian *Schmidtea mediterranea* after dimethylsulfoxide (DMSO) exposure. *J Appl Toxicol*, 35, 319-26.
- TAKANO, T., PULVERS, J. N., INOUE, T., TARUI, H., SAKAMOTO, H., AGATA, K. & UMESONO, Y. 2007. Regeneration-dependent conditional gene knockdown (Readyknock) in planarian: demonstration of requirement for Djsnap-25 expression in the brain for negative phototactic behavior. *Dev Growth Differ*, 49, 383-94.
- TRAPNELL, C., PACHTER, L. & SALZBERG, S. L. 2009. TopHat: discovering splice junctions with RNA-Seq. *Bioinformatics*, 25, 1105-11.
- YUAN, Z., ZHAO, B. & ZHANG, Y. 2012. Effects of dimethylsulfoxide on behavior and antioxidant enzymes response of planarian *Dugesia japonica*. *Toxicol Ind Health*, 28, 449-57.
